# Supplementary material for: Viable bacterial communities in freshly pumped human milk and their changes during cold storage conditions
Source: Springer Nature journal article supplement (doi:10.1186/s13006-025-00738-0), 2025-05-29

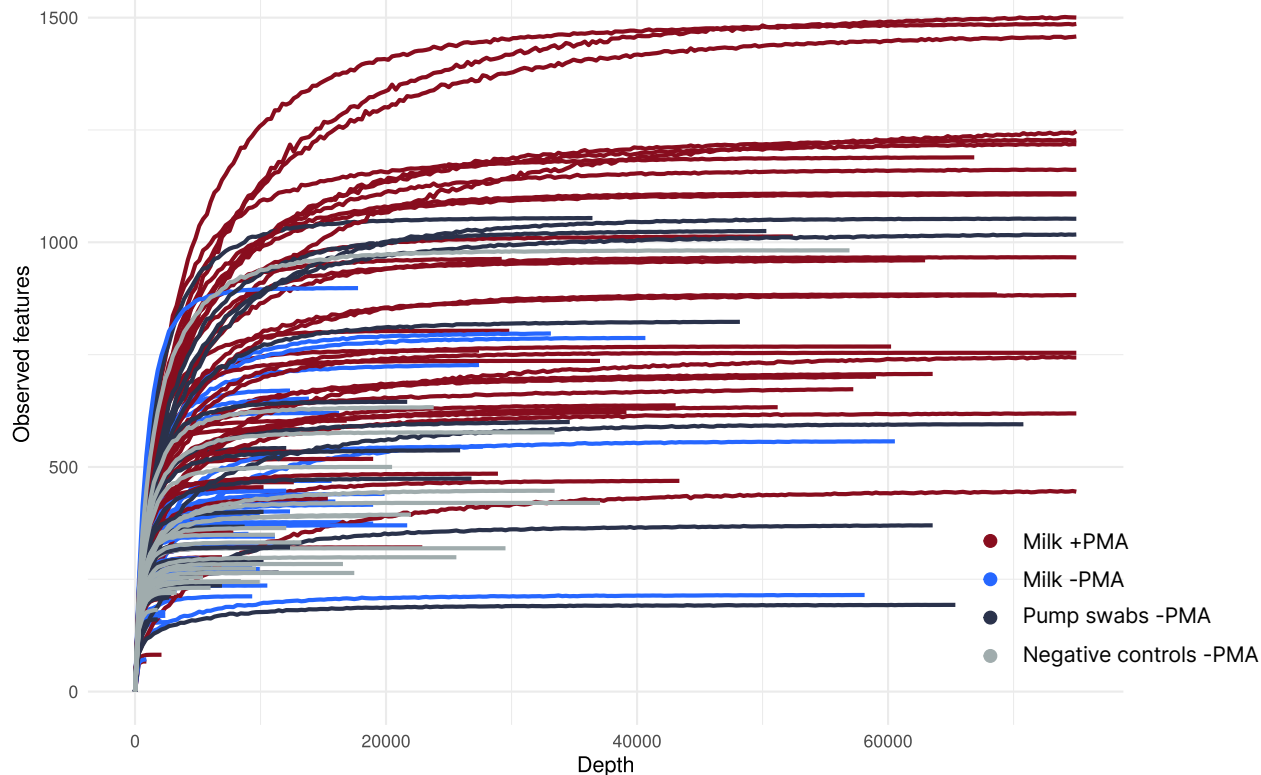

**Supplementary Figure S1. Sequencing depth with alpha rarefaction curves in all analyzed samples (n = 142).** Samples with PMA treatment (+PMA; only viable genera) as well as without PMA treatment (-PMA; both viable and non-viable bacterial genera) are shown.

| total<br>n = 142                                                                                                                                                                                                                                                                                            | label                          | human milk                                                        |                                                                         |                                                                      |                                                                          |                                                                     |                                                                      |                                                             |                                                                   |                                                               |                                                             | p-value                          |
|-------------------------------------------------------------------------------------------------------------------------------------------------------------------------------------------------------------------------------------------------------------------------------------------------------------|--------------------------------|-------------------------------------------------------------------|-------------------------------------------------------------------------|----------------------------------------------------------------------|--------------------------------------------------------------------------|---------------------------------------------------------------------|----------------------------------------------------------------------|-------------------------------------------------------------|-------------------------------------------------------------------|---------------------------------------------------------------|-------------------------------------------------------------|----------------------------------|
|                                                                                                                                                                                                                                                                                                             |                                | 0 h                                                               |                                                                         | 24 h                                                                 |                                                                          | 48 h                                                                |                                                                      | 6 weeks                                                     |                                                                   | pump swabs                                                    | negative controls                                           |                                  |
|                                                                                                                                                                                                                                                                                                             |                                | +PMA<br>n = 12 (8.5%)                                             | -PMA<br>n = 12 (8.5%)                                                   | +PMA<br>n = 12 (8.5%)                                                | -PMA<br>n = 12 (8.5%)                                                    | +PMA<br>n = 12 (8.5%)                                               | -PMA<br>n = 12 (8.5%)                                                | +PMA<br>n = 12 (8.5%)                                       | -PMA<br>n = 12 (8.5%)                                             | -PMA<br>n = 24 (16.9%)                                        | -PMA<br>n = 22 (15.5%)                                      |                                  |
| sequencing depth                                                                                                                                                                                                                                                                                            |                                |                                                                   |                                                                         |                                                                      |                                                                          |                                                                     |                                                                      |                                                             |                                                                   |                                                               |                                                             |                                  |
| [0   1440   <u>5959.5</u>   34602   236697]<br>25658.81±40063.76                                                                                                                                                                                                                                            | five number summary<br>mean±sd | [687   3923   <u>9003.5</u>   19490   60027]<br>14562.92±16904.53 | [23342   29982   <u>72746</u>   109257.5   236697]<br>85814.17±65165.99 | [518   1589.5   <u>4950.5</u>   9283.5   58138]<br>11022.08±16947.94 | [6369   38159.5   <u>61510.5</u>   74114.5   125347]<br>56355.5±32357.58 | [557   1249.5   <u>3333</u>   12312.5   64698]<br>10766.67±18297.46 | [2780   15560.5   <u>56298</u>   80459   148187]<br>56371.08±47246.3 | [187   448   <u>965.5</u>   3781.5   8890]<br>2636±3143.96  | [1753   8956   <u>43313</u>   66746   86622]<br>41003.75±30897.43 | [0   876   <u>1619</u>   4751.5   157290]<br>9055.79±31665.87 | [229   803   <u>2242</u>   3548   29572]<br>3810.27±6223.63 | < <b>0.001</b><br>< <b>0.001</b> |
| Shannon index                                                                                                                                                                                                                                                                                               |                                |                                                                   |                                                                         |                                                                      |                                                                          |                                                                     |                                                                      |                                                             |                                                                   |                                                               |                                                             |                                  |
| [0   3.7   <u>4.75</u>   5.61   6.29]<br>4.53±1.28                                                                                                                                                                                                                                                          | five number summary<br>mean±sd | [2.58   4.63   <u>4.98</u>   5.49   6.29]<br>4.83±1.05            | [5.16   5.56   <u>5.85</u>   5.97   6.18]<br>5.76±0.33                  | [2.28   3.91   <u>4.49</u>   4.95   5.82]<br>4.38±1                  | [4.9   5.32   <u>5.63</u>   5.95   6.1]<br>5.59±0.41                     | [2.36   3.58   <u>4.13</u>   4.67   5.61]<br>4.08±0.98              | [4.33   5.2   <u>5.7</u>   5.97   6.23]<br>5.51±0.6                  | [1.89   2.47   <u>3.98</u>   4.44   4.8]<br>3.58±1.08       | [4.9   5.59   <u>5.7</u>   5.83   5.94]<br>5.63±0.33              | [0   2.74   <u>3.95</u>   4.56   5.57]<br>3.62±1.32           | [1.53   2.98   <u>3.93</u>   4.75   6.09]<br>3.84±1.24      | < <b>0.001</b><br>< <b>0.001</b> |
| Acinetobacter (CLR transformation)                                                                                                                                                                                                                                                                          |                                |                                                                   |                                                                         |                                                                      |                                                                          |                                                                     |                                                                      |                                                             |                                                                   |                                                               |                                                             |                                  |
| [-1.27   -0.56   <u>-0.2</u>   7.16   15.4]<br>2.61±4.34                                                                                                                                                                                                                                                    | five number summary<br>mean±sd | [-0.88   -0.58   <u>-0.2</u>   6.71   9.78]<br>2.94±4.4           | [-1.15   -0.56   <u>6.56</u>   8.79   9.65]<br>4.88±4.41                | [-0.91   -0.54   <u>-0.32</u>   7.68   10.29]<br>2.59±4.6            | [-0.78   3.03   <u>7.37</u>   8.09   11.09]<br>5.81±4.05                 | [-0.7   -0.18   <u>6.53</u>   8.24   15.4]<br>5.14±5.32             | [-0.9   -0.6   <u>-0.17</u>   8.03   9.41]<br>3.07±4.52              | [-0.67   -0.45   <u>-0.21</u>   -0.13   0.09]<br>-0.27±0.23 | [-0.94   -0.8   <u>-0.62</u>   -0.39   6.3]<br>-0.04±2.01         | [-1.13   -0.41   <u>-0.21</u>   6.44   12.14]<br>2.5±4.45     | [-1.27   -0.56   <u>-0.28</u>   -0.04   11.41]<br>0.97±3.59 | 0.1<br>< <b>0.001</b>            |
| Anaerococcus (CLR transformation)                                                                                                                                                                                                                                                                           |                                |                                                                   |                                                                         |                                                                      |                                                                          |                                                                     |                                                                      |                                                             |                                                                   |                                                               |                                                             |                                  |
| [-1.37   -0.58   <u>-0.3</u>   0.21   10.54]<br>1.57±3.74                                                                                                                                                                                                                                                   | five number summary<br>mean±sd | [-0.83   -0.57   <u>-0.33</u>   7.04   10.38]<br>2.92±4.41        | [-1.13   -0.69   <u>6.5</u>   8.51   10.51]<br>4.42±4.69                | [-1   -0.55   <u>-0.46</u>   -0.28   9.12]<br>0.77±3.12              | [-0.92   -0.77   <u>-0.53</u>   7.09   8.27]<br>2.1±4.12                 | [-0.92   -0.74   <u>-0.45</u>   -0.24   8.93]<br>0.26±2.74          | [-0.99   -0.47   <u>3.41</u>   8.1   10.31]<br>3.88±4.66             | [-0.51   -0.19   <u>-0.13</u>   -0.03   0.21]<br>-0.13±0.19 | [-1.29   -0.62   <u>2.74</u>   8.47   10.54]<br>3.63±4.71         | [-1   -0.73   <u>-0.26</u>   -0.11   10.02]<br>0.43±2.87      | [-1.37   -0.49   <u>-0.35</u>   -0.29   8.06]<br>-0.07±1.85 | 0.519<br><b>0.007</b>            |
| Bacillus (CLR transformation)                                                                                                                                                                                                                                                                               |                                |                                                                   |                                                                         |                                                                      |                                                                          |                                                                     |                                                                      |                                                             |                                                                   |                                                               |                                                             |                                  |
| [-1.42   -0.44   <u>6.93</u>   9.36   19.53]<br>5.39±6.2                                                                                                                                                                                                                                                    | five number summary<br>mean±sd | [-0.59   -0.48   <u>6.67</u>   9.67   16.72]<br>5.8±6.27          | [-1.21   -0.74   <u>7.3</u>   12.86   18.38]<br>6.73±7.63               | [-0.58   -0.39   <u>7.92</u>   10.9   17.07]<br>6.43±6.59            | [-0.94   -0.58   <u>7.81</u>   11.51   17.56]<br>6.63±7.14               | [-0.89   -0.56   <u>-0.17</u>   10.32   16.17]<br>4.48±6.4          | [-0.8   -0.21   <u>8.35</u>   10.22   19.15]<br>7.37±6.82            | [-0.36   -0.13   <u>-0.03</u>   8.46   15.34]<br>3.36±5.42  | [-1.16   3.14   <u>8.22</u>   9.23   18.33]<br>7.7±6.37           | [-0.71   -0.09   <u>7.88</u>   9.38   19.53]<br>5.59±5.54     | [-1.42   -0.47   <u>-0.16</u>   7.56   11.02]<br>2.26±4.52  | 0.768<br>0.519                   |
| Bacteroides (CLR transformation)                                                                                                                                                                                                                                                                            |                                |                                                                   |                                                                         |                                                                      |                                                                          |                                                                     |                                                                      |                                                             |                                                                   |                                                               |                                                             |                                  |
| [-1.35   -0.76   <u>-0.44</u>   -0.11   9.33]<br>0.45±2.73                                                                                                                                                                                                                                                  | five number summary<br>mean±sd | [-0.89   -0.78   <u>-0.41</u>   2.87   8.61]<br>1.3±3.48          | [-1.13   -1.04   <u>-0.72</u>   -0.3   8.93]<br>0.64±3.32               | [-0.98   -0.67   <u>-0.63</u>   -0.5   -0.26]<br>-0.6±0.18           | [-1.35   -1.18   <u>-0.78</u>   -0.5   0.03]<br>-0.78±0.47               | [-0.87   -0.45   <u>-0.33</u>   -0.26   7.78]<br>0.28±2.37          | [-1.22   -1.1   <u>-0.77</u>   -0.43   -0.06]<br>-0.74±0.39          | [-0.76   -0.32   <u>-0.25</u>   -0.08   0.1]<br>-0.24±0.24  | [-0.98   -0.89   <u>-0.43</u>   -0.18   -0.11]<br>-0.5±0.34       | [-1.09   -0.6   <u>-0.3</u>   3.52   9.33]<br>1.71±3.87       | [-1.08   -0.58   <u>-0.22</u>   0   8.97]<br>1.38±3.49      | <b>0.007</b><br><b>0.001</b>     |
| Cutibacterium (CLR transformation)                                                                                                                                                                                                                                                                          |                                |                                                                   |                                                                         |                                                                      |                                                                          |                                                                     |                                                                      |                                                             |                                                                   |                                                               |                                                             |                                  |
| [-0.86   -0.26   <u>7.53</u>   9.65   11.99]<br>5.39±4.82                                                                                                                                                                                                                                                   | five number summary<br>mean±sd | [-0.32   7.59   <u>8.37</u>   9.29   10.61]<br>7.86±2.78          | [-0.41   8.85   <u>10.43</u>   10.77   11.59]<br>9.24±3.24              | [7.21   7.72   <u>8.23</u>   9.39   11.41]<br>8.71±1.39              | [6.34   7.54   <u>9.16</u>   10.54   11.99]<br>9.14±1.92                 | [-0.78   5.82   <u>7.15</u>   9.45   10.73]<br>6.63±3.77            | [-0.54   7.31   <u>9.4</u>   10.57   11.5]<br>7.91±4.17              | [-0.51   -0.28   <u>-0.23</u>   -0.15   0.01]<br>-0.22±0.14 | [-0.86   -0.8   <u>-0.62</u>   -0.27   -0.06]<br>-0.53±0.29       | [-0.69   -0.45   <u>-0.16</u>   9.48   11.94]<br>4.21±5.24    | [-0.73   -0.22   <u>0</u>   9.25   10.68]<br>3.58±4.77      | < <b>0.001</b><br>< <b>0.001</b> |
| Diaphorobacter (CLR transformation)                                                                                                                                                                                                                                                                         |                                |                                                                   |                                                                         |                                                                      |                                                                          |                                                                     |                                                                      |                                                             |                                                                   |                                                               |                                                             |                                  |
| [-1.29   -0.31   <u>6.28</u>   8.96   15.82]<br>4.54±4.86                                                                                                                                                                                                                                                   | five number summary<br>mean±sd | [6.73   8.23   <u>8.92</u>   9.59   10.92]<br>8.91±1.13           | [-0.72   2.89   <u>7.92</u>   9.97   15.82]<br>6.94±5.11                | [-0.58   -0.19   <u>8.16</u>   8.67   11.7]<br>5.75±4.63             | [-1.29   -0.62   <u>-0.24</u>   6.89   10.78]<br>2.71±4.34               | [-0.49   7.09   <u>8.22</u>   9.6   11.51]<br>7.24±3.79             | [-1.12   2.59   <u>7.81</u>   8.8   9.32]<br>5.78±4.17               | [-0.61   -0.39   <u>-0.16</u>   0   0.21]<br>-0.18±0.25     | [-1.13   -0.67   <u>-0.57</u>   -0.29   -0.08]<br>-0.54±0.32      | [-0.99   -0.23   <u>3.59</u>   9.59   11.99]<br>4.63±5.14     | [-0.89   -0.31   <u>-0.01</u>   9.4   13.53]<br>4.27±5.3    | < <b>0.001</b><br>< <b>0.001</b> |
| Gemella (CLR transformation)                                                                                                                                                                                                                                                                                |                                |                                                                   |                                                                         |                                                                      |                                                                          |                                                                     |                                                                      |                                                             |                                                                   |                                                               |                                                             |                                  |
| [-1.37   -0.38   <u>0.11</u>   9.91   14.47]<br>4.75±5.54                                                                                                                                                                                                                                                   | five number summary<br>mean±sd | [-0.82   -0.51   <u>3.67</u>   9.04   11.07]<br>4.37±5.13         | [-0.6   8.98   <u>11.64</u>   12.98   14.09]<br>10.44±3.96              | [-0.6   -0.5   <u>-0.28</u>   6.34   11.32]<br>2.51±4.54             | [-0.5   9.24   <u>11.48</u>   12.85   14.04]<br>10.54±3.91               | [-0.59   -0.39   <u>-0.23</u>   2.81   10.29]<br>1.59±3.61          | [-0.45   8.62   <u>10.5</u>   12.23   14.47]<br>9.21±4.74            | [-0.53   -0.16   <u>-0.03</u>   8.42   9.1]<br>2.81±4.4     | [-0.58   7.77   <u>10.55</u>   12   13.6]<br>8.9±4.76             | [-0.92   -0.57   <u>-0.25</u>   2.97   8.92]<br>1.63±3.67     | [-1.37   -0.66   <u>-0.23</u>   0   12.62]<br>1.38±4.11     | < <b>0.001</b><br>< <b>0.001</b> |
| Rothia (CLR transformation)                                                                                                                                                                                                                                                                                 |                                |                                                                   |                                                                         |                                                                      |                                                                          |                                                                     |                                                                      |                                                             |                                                                   |                                                               |                                                             |                                  |
| [-1.16   -0.29   <u>7.07</u>   10.33   15.87]<br>5.38±5.72                                                                                                                                                                                                                                                  | five number summary<br>mean±sd | [-0.68   -0.39   <u>7.72</u>   9.22   10.94]<br>5.69±4.72         | [-0.77   10.89   <u>12.63</u>   13.96   15.87]<br>10.86±5.56            | [-1.12   -0.61   <u>-0.18</u>   8.28   11.32]<br>3.35±4.92           | [-1.16   9.46   <u>11.11</u>   13.02   13.76]<br>9.57±5.14               | [-0.47   -0.3   <u>-0.2</u>   8.05   10.33]<br>3.47±4.74            | [-0.66   9.06   <u>11.76</u>   13.45   14.17]<br>9.73±5.09           | [-0.63   -0.19   <u>-0.03</u>   6.64   8.8]<br>2.38±3.85    | [-0.16   9.71   <u>11.9</u>   12.44   13.12]<br>10.23±3.84        | [-0.99   -0.5   <u>-0.28</u>   0.04   10.58]<br>1.22±3.7      | [-1.04   -0.3   <u>0.02</u>   8.17   11.96]<br>3.26±4.9     | < <b>0.001</b><br>< <b>0.001</b> |
| Staphylococcus (CLR transformation)                                                                                                                                                                                                                                                                         |                                |                                                                   |                                                                         |                                                                      |                                                                          |                                                                     |                                                                      |                                                             |                                                                   |                                                               |                                                             |                                  |
| [-0.85   9.38   <u>11.58</u>   13.4   17.51]<br>11±3.96                                                                                                                                                                                                                                                     | five number summary<br>mean±sd | [8.57   9.7   <u>11.99</u>   13   15.06]<br>11.62±2.24            | [10.73   13.16   <u>14.36</u>   15.85   16.5]<br>14.31±1.75             | [8.87   9.57   <u>11.34</u>   12.88   13.93]<br>11.35±1.76           | [7.09   12.48   <u>14.13</u>   15.9   17.51]<br>13.84±2.89               | [-0.85   9.47   <u>11.1</u>   13.04   15.09]<br>10.52±4.13          | [9.77   11.71   <u>13.43</u>   15.17   16.43]<br>13.41±2.11          | [6.57   9.71   <u>11.18</u>   13.03   14.47]<br>11.18±2.26  | [10.64   12.29   <u>13.29</u>   16.02   16.31]<br>13.66±2.1       | [-0.41   3.72   <u>9.21</u>   10.3   12.52]<br>7.36±4.62      | [-0.42   8.42   <u>9.07</u>   11.34   13.52]<br>8.51±3.9    | < <b>0.001</b><br>< <b>0.001</b> |
| Streptococcus (CLR transformation)                                                                                                                                                                                                                                                                          |                                |                                                                   |                                                                         |                                                                      |                                                                          |                                                                     |                                                                      |                                                             |                                                                   |                                                               |                                                             |                                  |
| [-1.2   8.81   <u>10.85</u>   15.13   19.2]<br>10.76±5.3                                                                                                                                                                                                                                                    | five number summary<br>mean±sd | [9.52   10.7   <u>12.66</u>   13.61   16.13]<br>12.33±1.93        | [11.64   16.05   <u>16.51</u>   17.58   19.2]<br>16.53±1.89             | [-1.2   9.28   <u>9.93</u>   11.22   13.5]<br>9.61±3.72              | [11.55   14.82   <u>16.73</u>   17.23   17.9]<br>15.96±1.88              | [-0.26   2.3   <u>8.51</u>   9.84   12.71]<br>6.59±4.56             | [13.38   14.87   <u>15.68</u>   17.23   18.07]<br>15.79±1.51         | [-0.28   0.1   <u>7.75</u>   9.25   11.53]<br>5.86±4.51     | [12.9   14.68   <u>15.62</u>   16.7   17.58]<br>15.61±1.41        | [-0.69   2.94   <u>8.51</u>   9.45   12.05]<br>6.69±4.42      | [-0.57   6.13   <u>9.8</u>   11.28   14.15]<br>8.55±4.24    | < <b>0.001</b><br>< <b>0.001</b> |
| Veillonella (CLR transformation)                                                                                                                                                                                                                                                                            |                                |                                                                   |                                                                         |                                                                      |                                                                          |                                                                     |                                                                      |                                                             |                                                                   |                                                               |                                                             |                                  |
| [-1.13   -0.26   <u>7.57</u>   10.56   15.58]<br>5.69±5.62                                                                                                                                                                                                                                                  | five number summary<br>mean±sd | [-0.79   -0.39   <u>8.43</u>   10.49   13.16]<br>6.48±5.49        | [-0.76   8.79   <u>11.33</u>   12.83   14.71]<br>9.71±5.17              | [-0.65   -0.3   <u>3.62</u>   9.19   13.76]<br>4.68±5.37             | [-0.55   8.89   <u>11.02</u>   13.85   15]<br>9.84±5.28                  | [-0.62   -0.43   <u>-0.21</u>   7   9.25]<br>2.4±4.09               | [-0.22   8.47   <u>10.93</u>   13.45   15.58]<br>9.72±5.14           | [-0.68   -0.33   <u>-0.14</u>   -0.03   9.15]<br>1.27±3.55  | [-0.4   7.85   <u>11.09</u>   12.22   14.17]<br>9.68±4.33         | [-0.78   -0.26   <u>6.74</u>   8.62   11.41]<br>4.6±4.75      | [-1.13   -0.37   <u>-0.08</u>   8.23   11.33]<br>2.39±4.49  | < <b>0.001</b><br>< <b>0.001</b> |
| Five-number summary stands for [minimum   1st quartile   <u>median</u>   3rd quartile   maximum].<br>To test difference in means an ANOVA test was used.<br>To test difference in medians a non-parametric ANOVA (Kruskal-Wallis test) was used.<br>All <i>p</i> -values were adjusted using Holm's method. |                                |                                                                   |                                                                         |                                                                      |                                                                          |                                                                     |                                                                      |                                                             |                                                                   |                                                               |                                                             |                                  |

**Supplementary Figure S2. Descriptive statistics for sequencing depth, Shannon diversity index, and centered log-ratio (CLR)–transformed relative abundances of selected genera, stratified by sample matrix, time point, and PMA treatment group.** All values are rounded to two decimals.



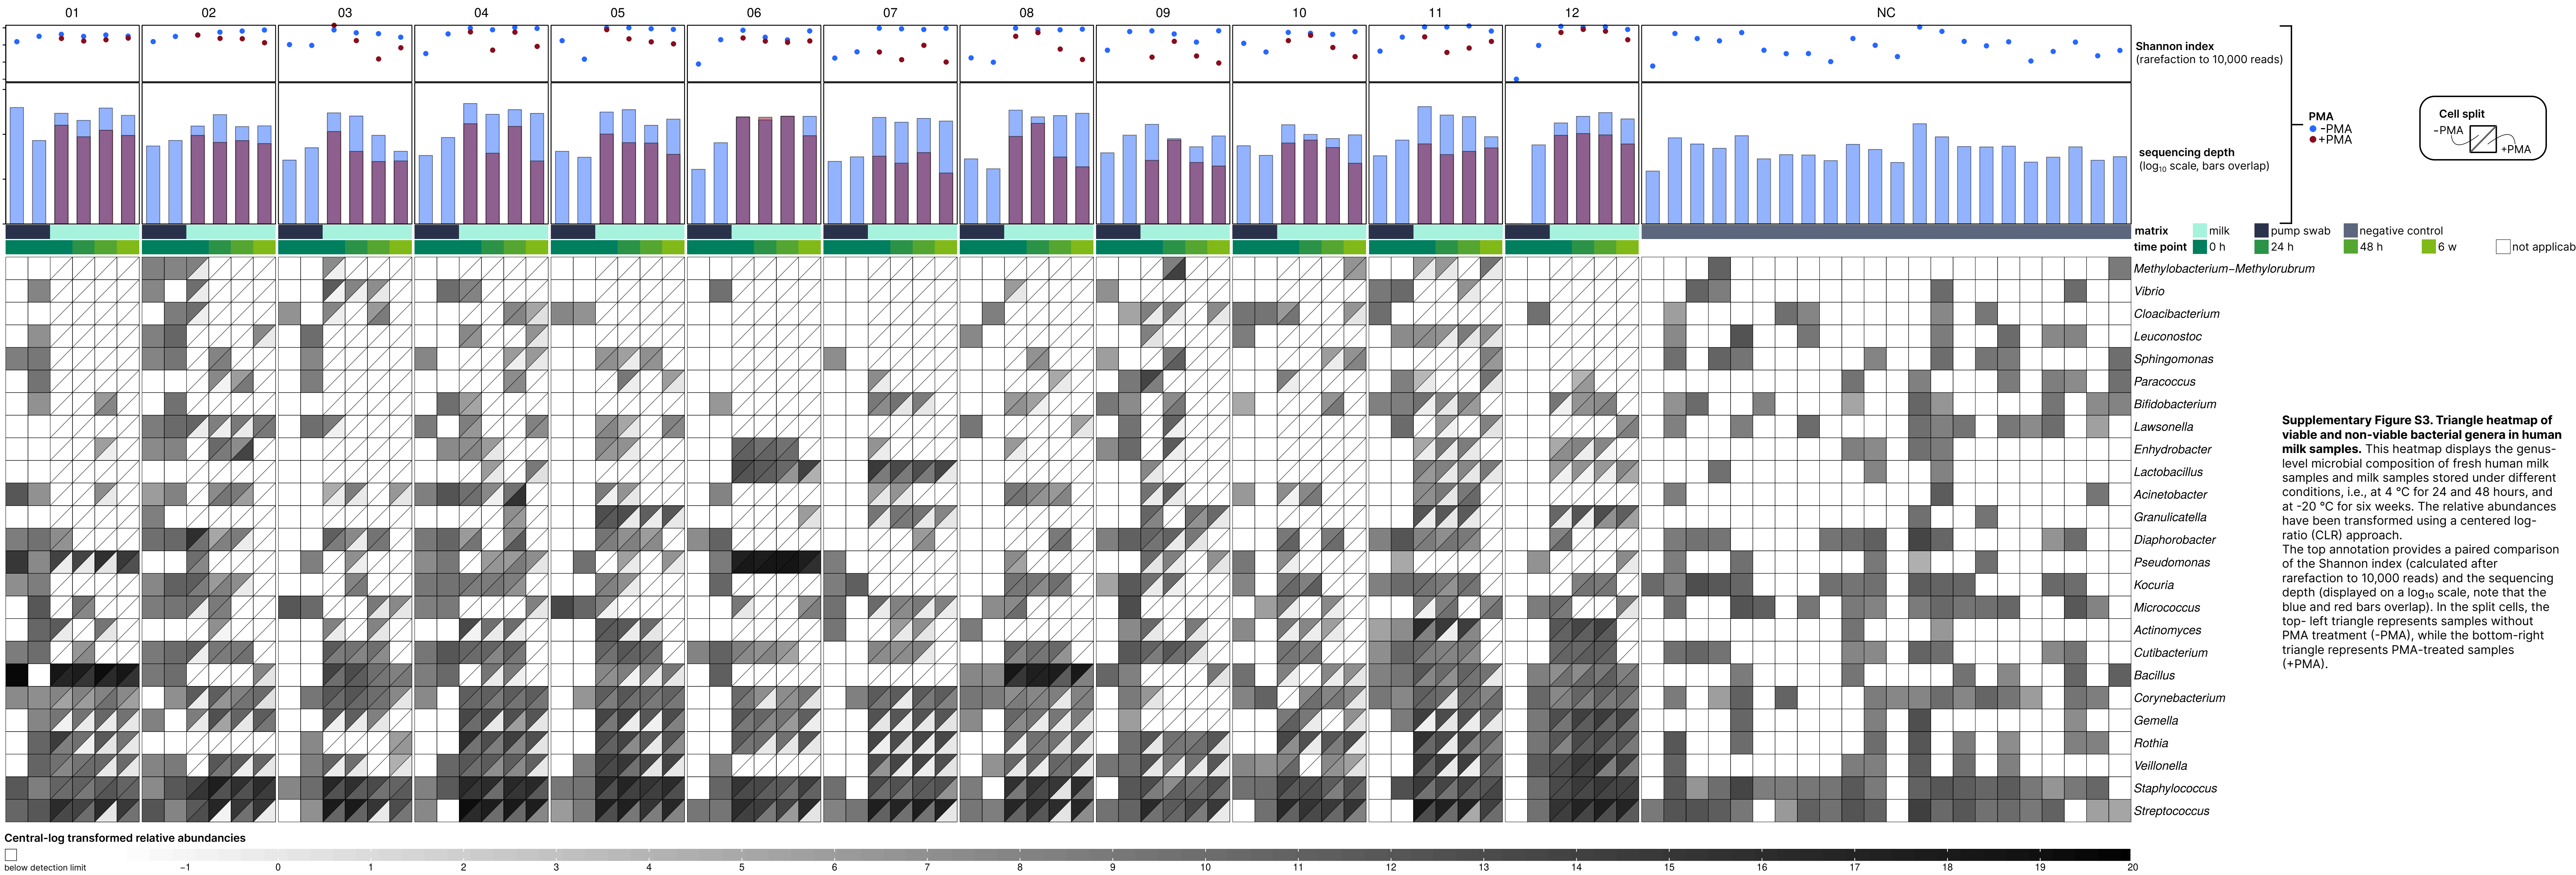

Supplement: MOESM1 [file 13006_2025_738_MOESM1_ESM.pdf]
